# Supplementary material for: Association of NCF2, IKZF1, IRF8, IFIH1, and TYK2 with Systemic Lupus Erythematosus
Source: PubMed Central journal article supplement (PMC3203198; doi:10.1371/journal.pgen.1002341), 2011-10-27
Supplement: pgen.1002341.s002.pdf [file pgen.1002341.s002.pdf]

Associated variant in *NCF2*: rs10911363

rs3845466

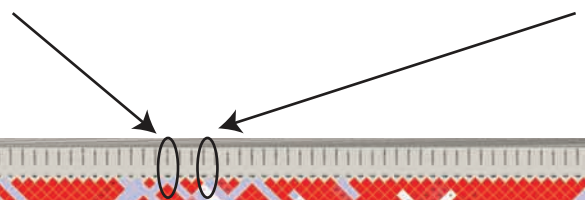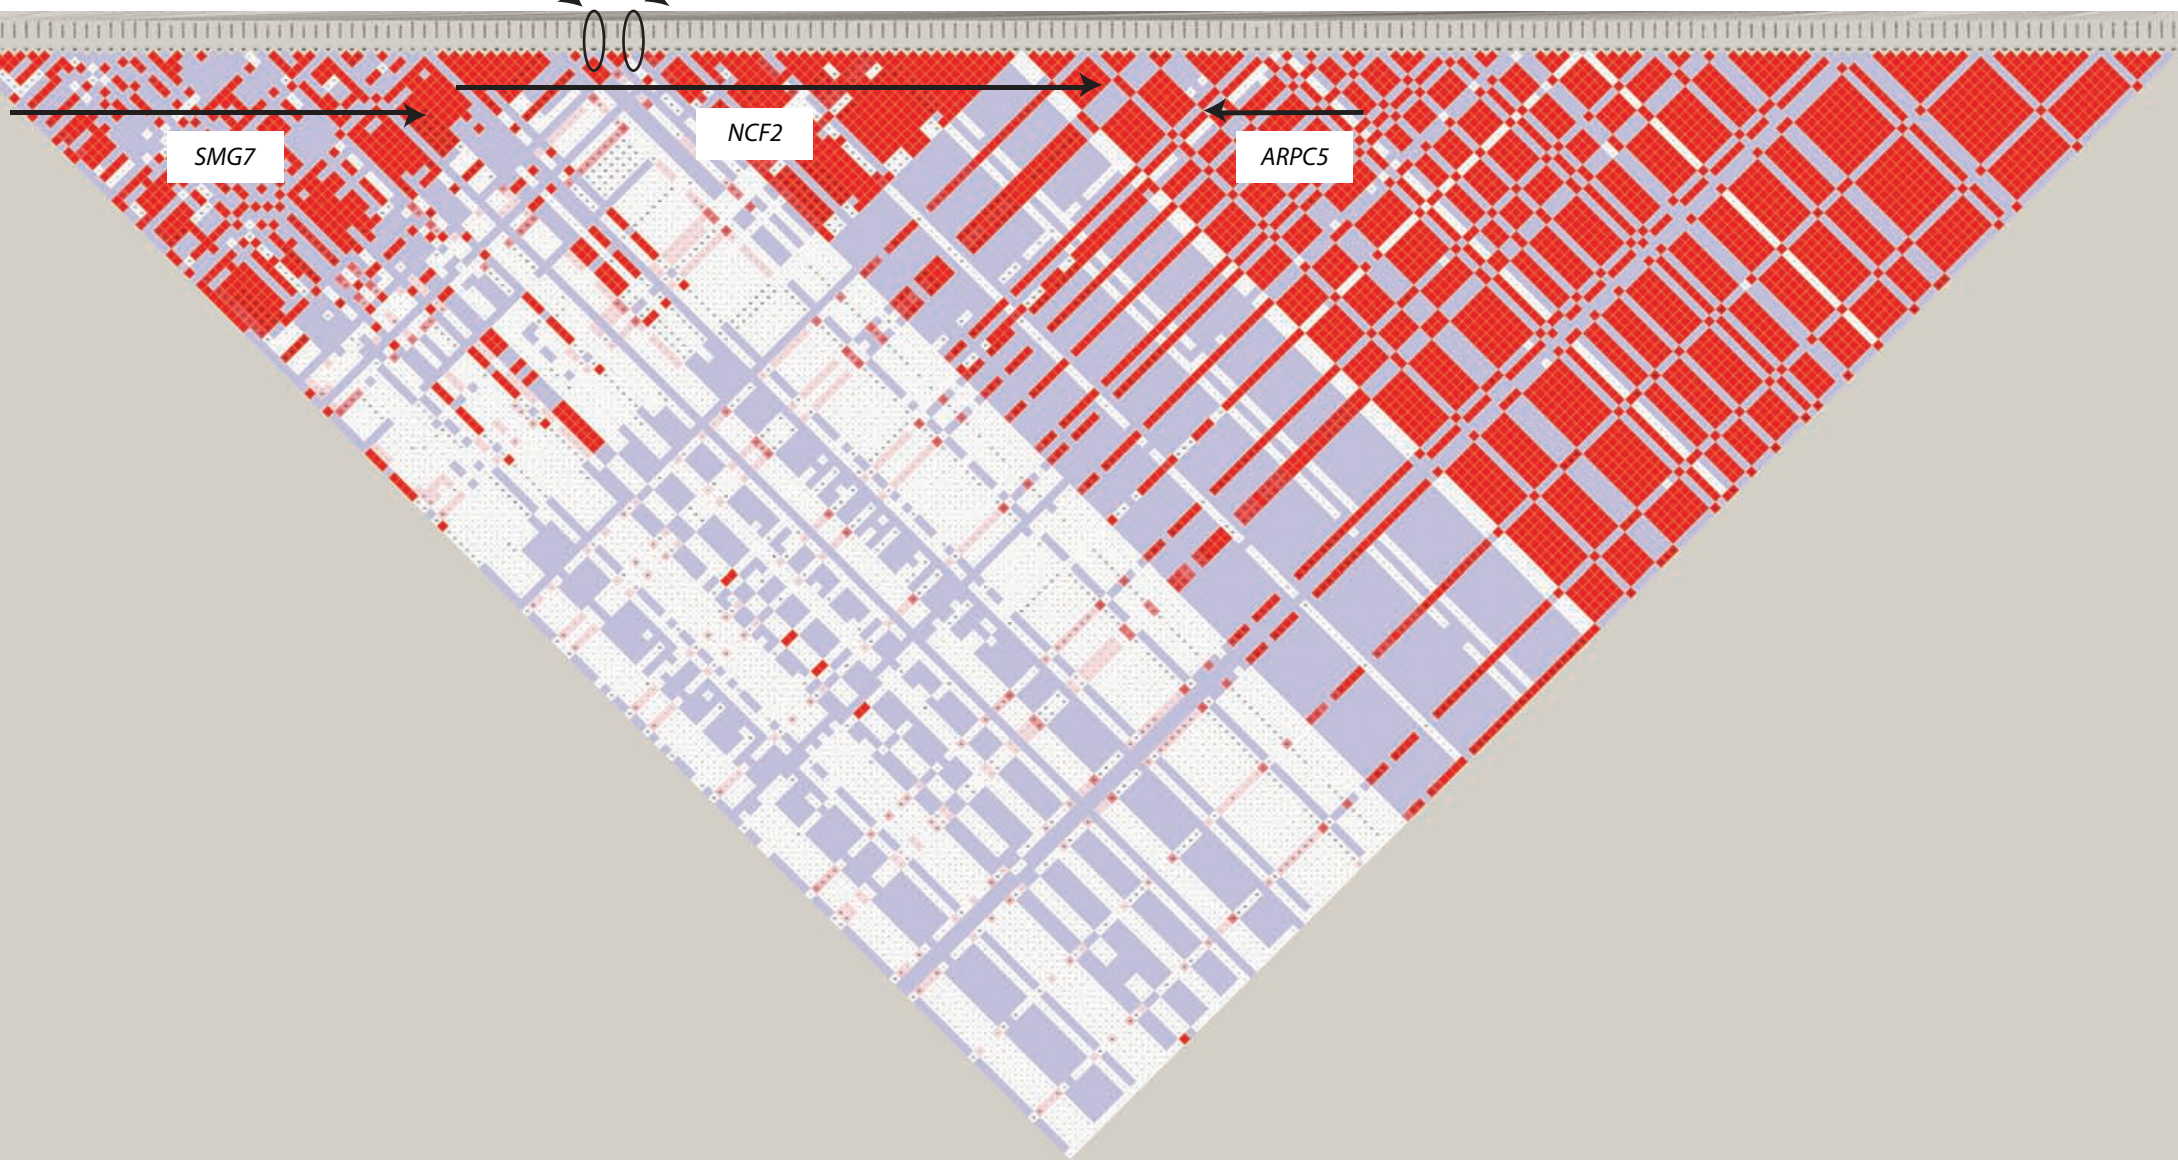

**Figure S2A: LD pattern in 200 kb region around rs10911363**

(Chr 1: 181,716,380-181,916,379- HAPMAP Data Rel 27 phase II+III Feb09, NCBI assembly dbSNP 126)

Published variant: rs921916

GW significant variant: rs2366293

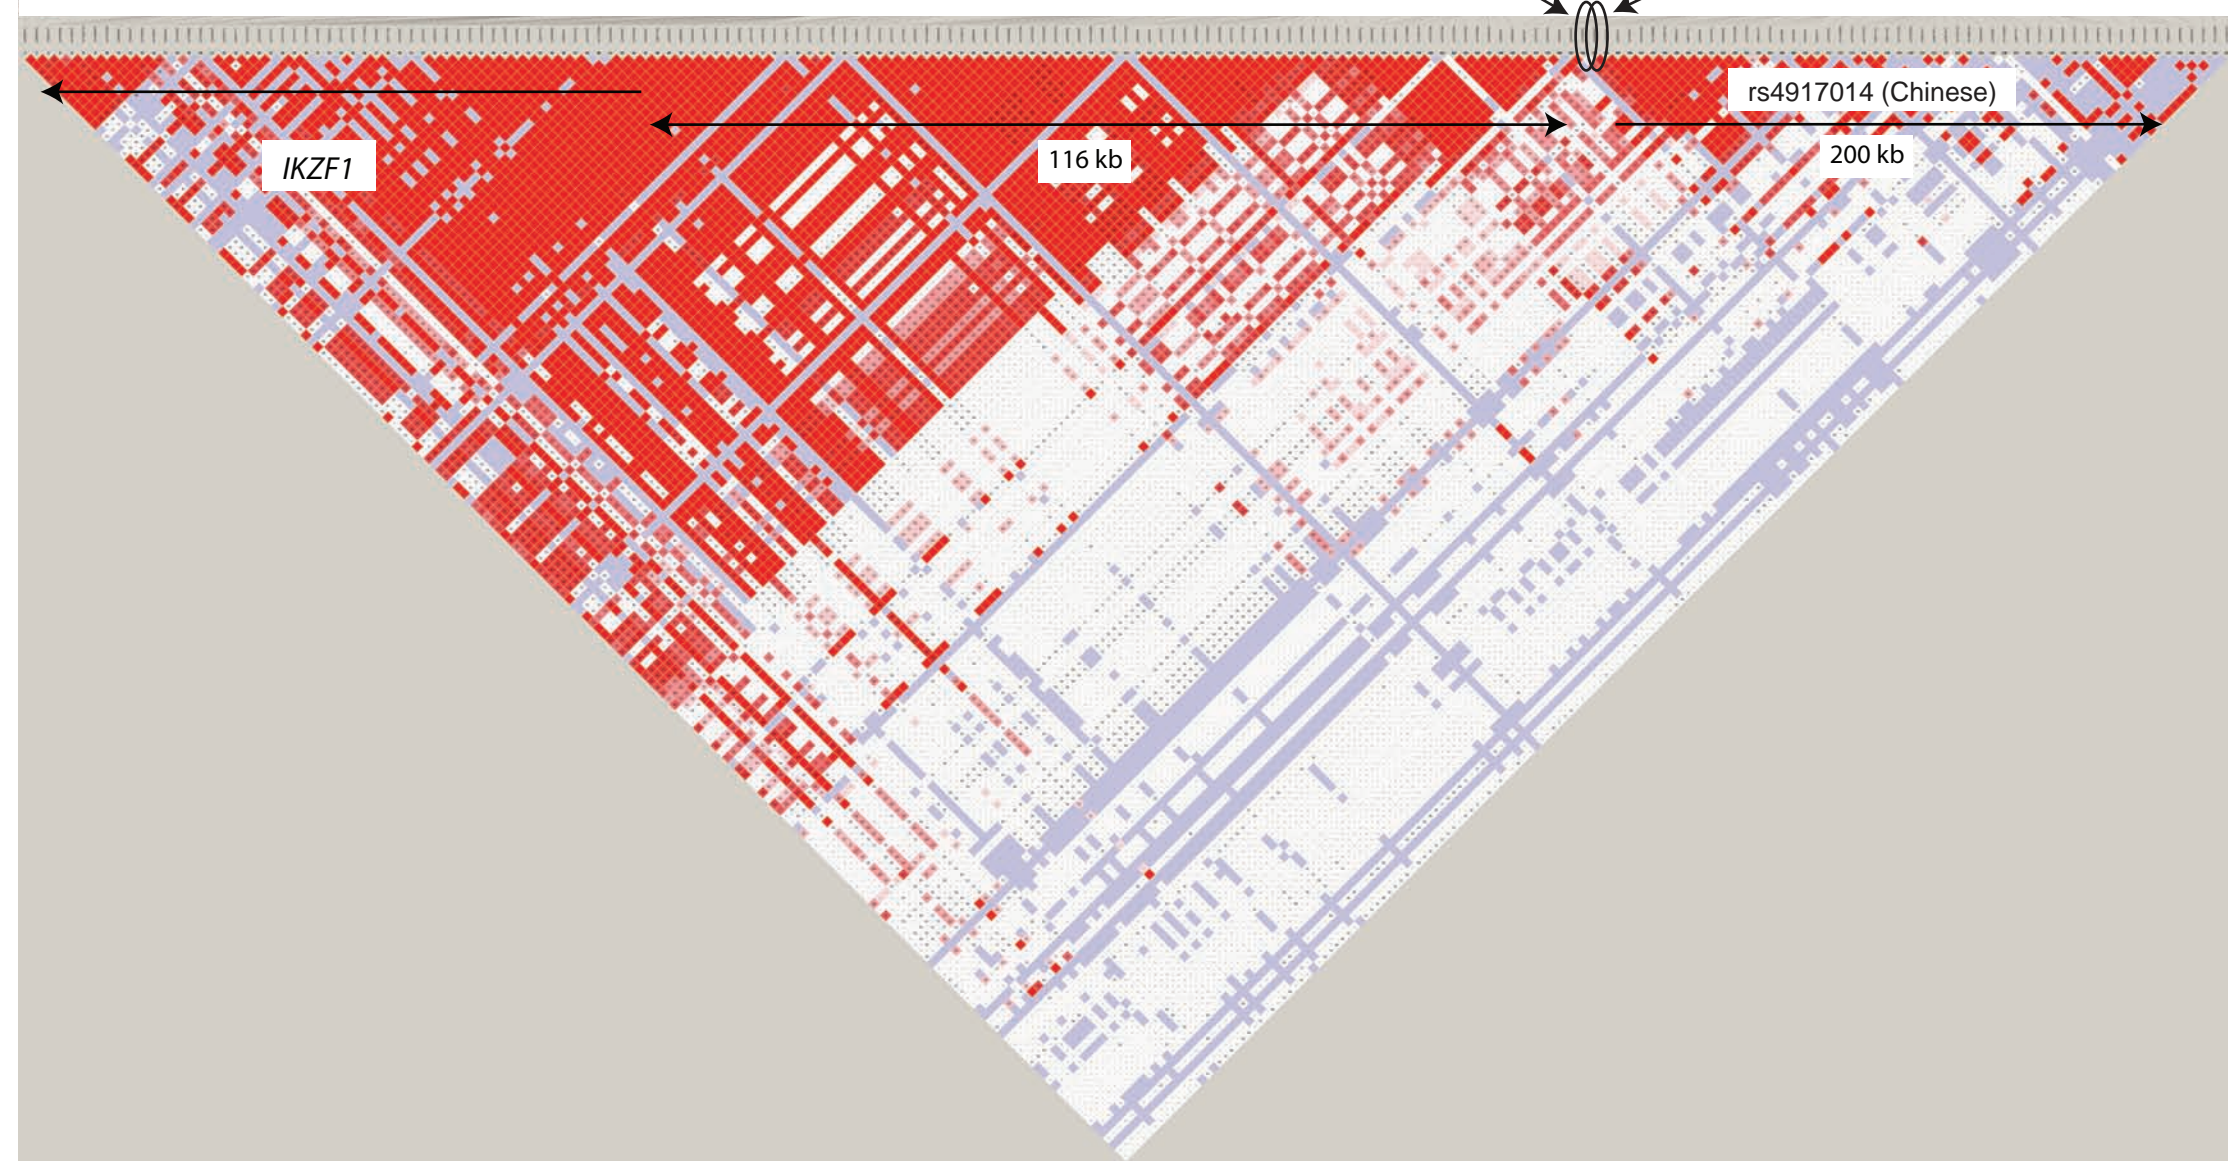

**Figure S2B: LD pattern in 155.8 kb region around rs2366293**

(Chr 7: 50,120,474-50,276,274 - HAPMAP Data Rel 27 phase II+III Feb09, NCBI assembly dbSNP 126)

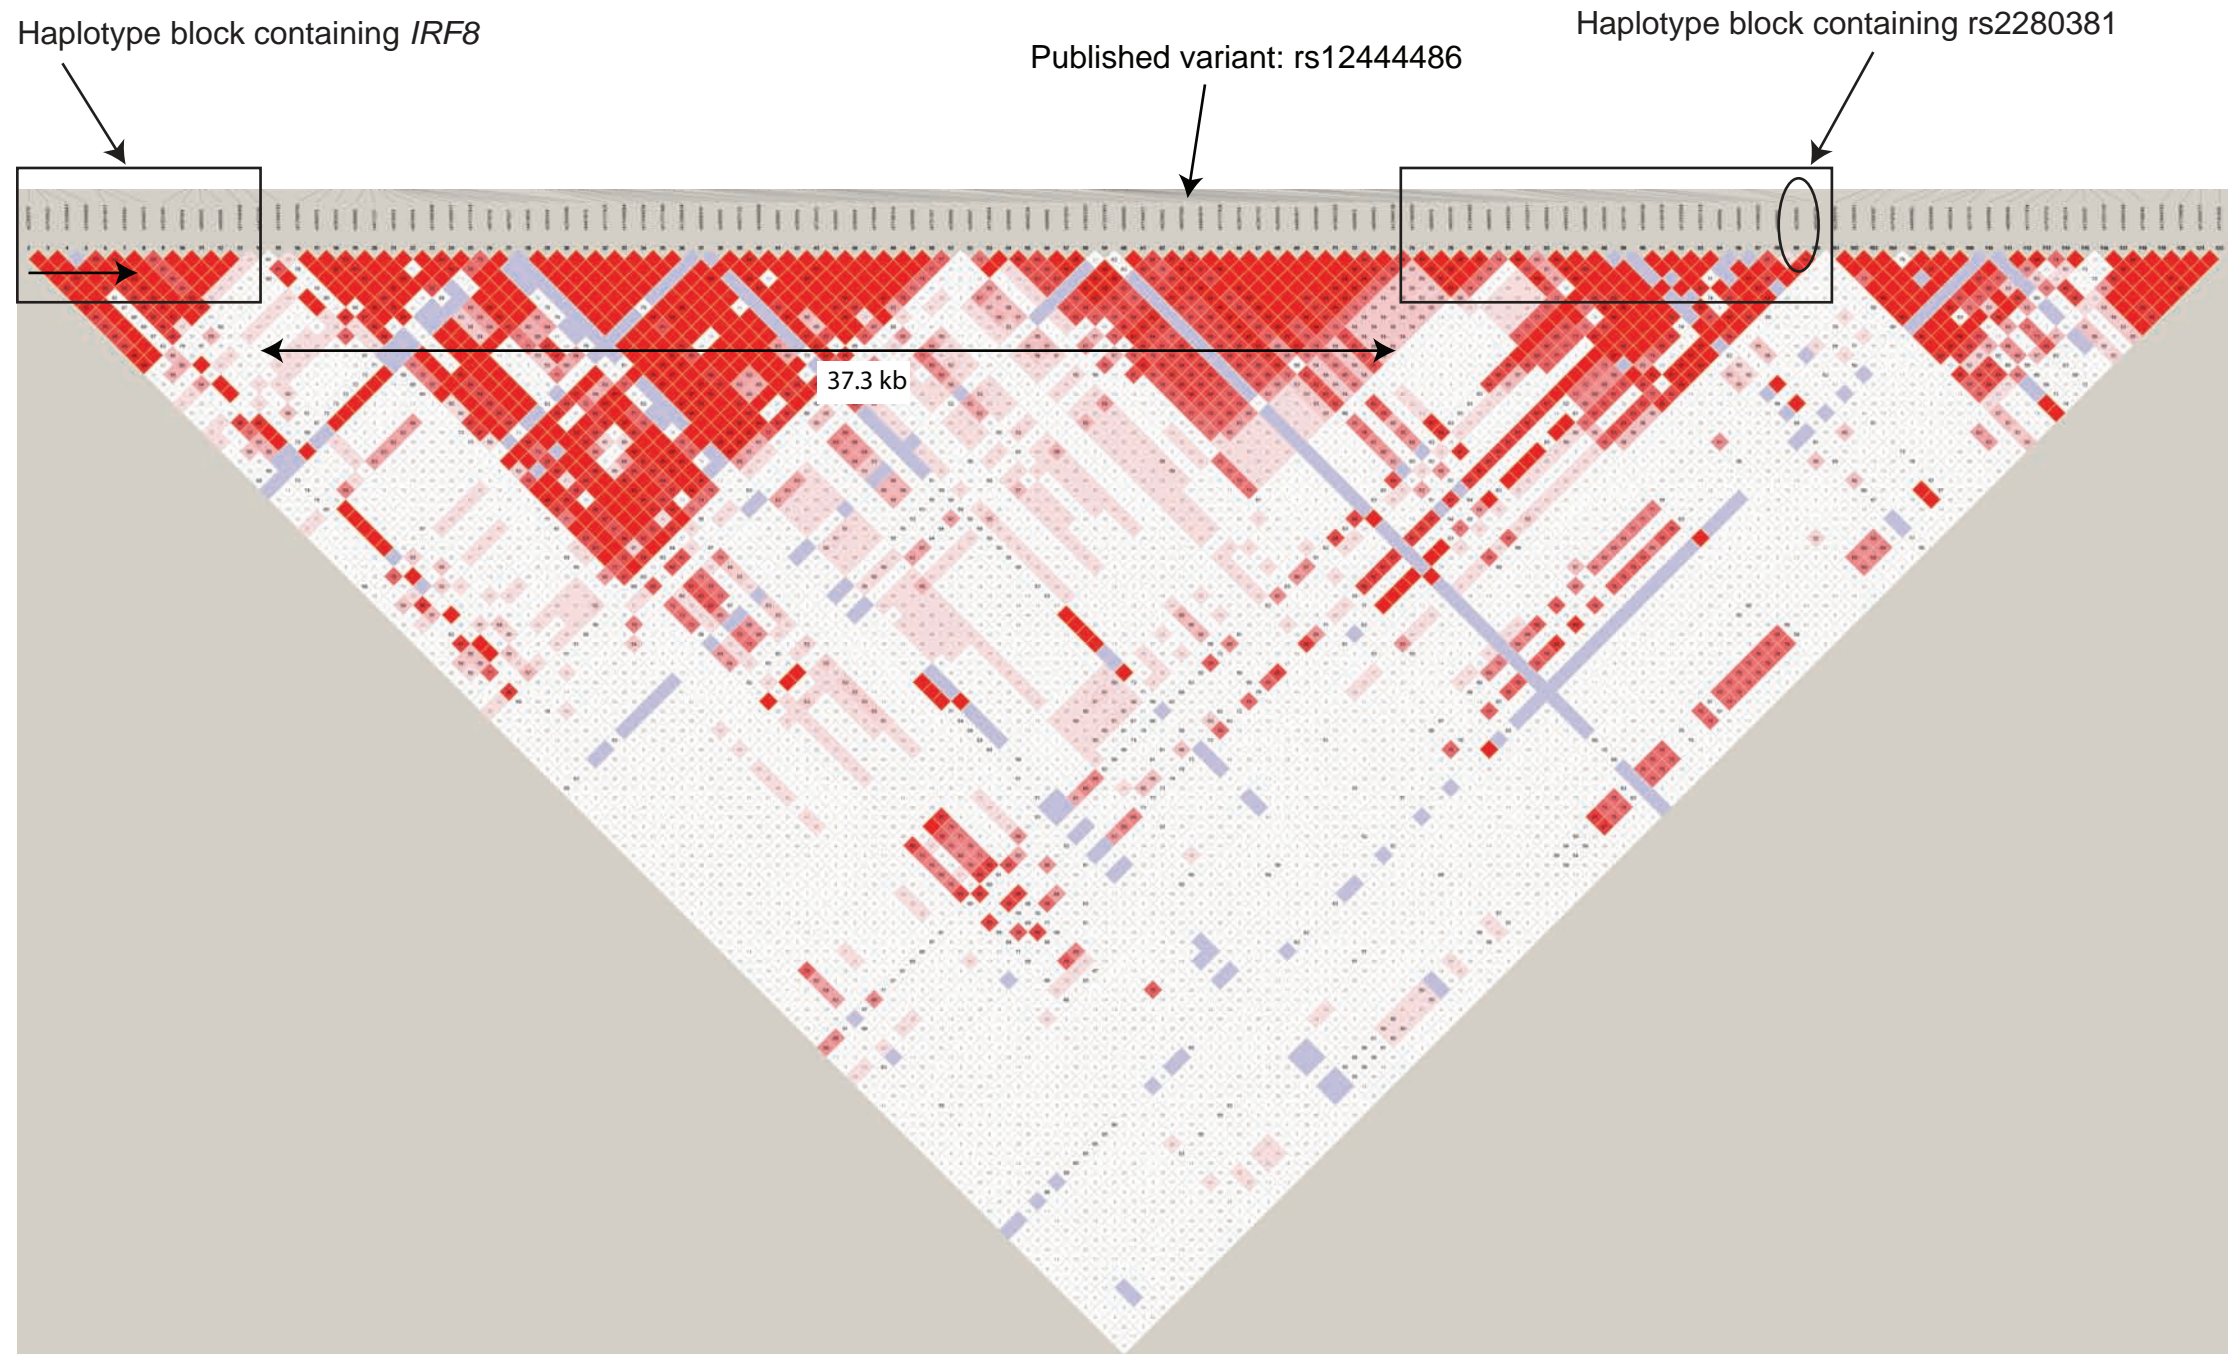

**Figure S2C: LD pattern in 100 kb region around the gap between *IRF8* and rs2280381**

(Chr 16: 84500150-845600149 - HAPMAP Data Rel 27 phase II+III Feb09, NCBI assembly dbSNP 126)

Associated variant in *IFIH1*: rs1990760

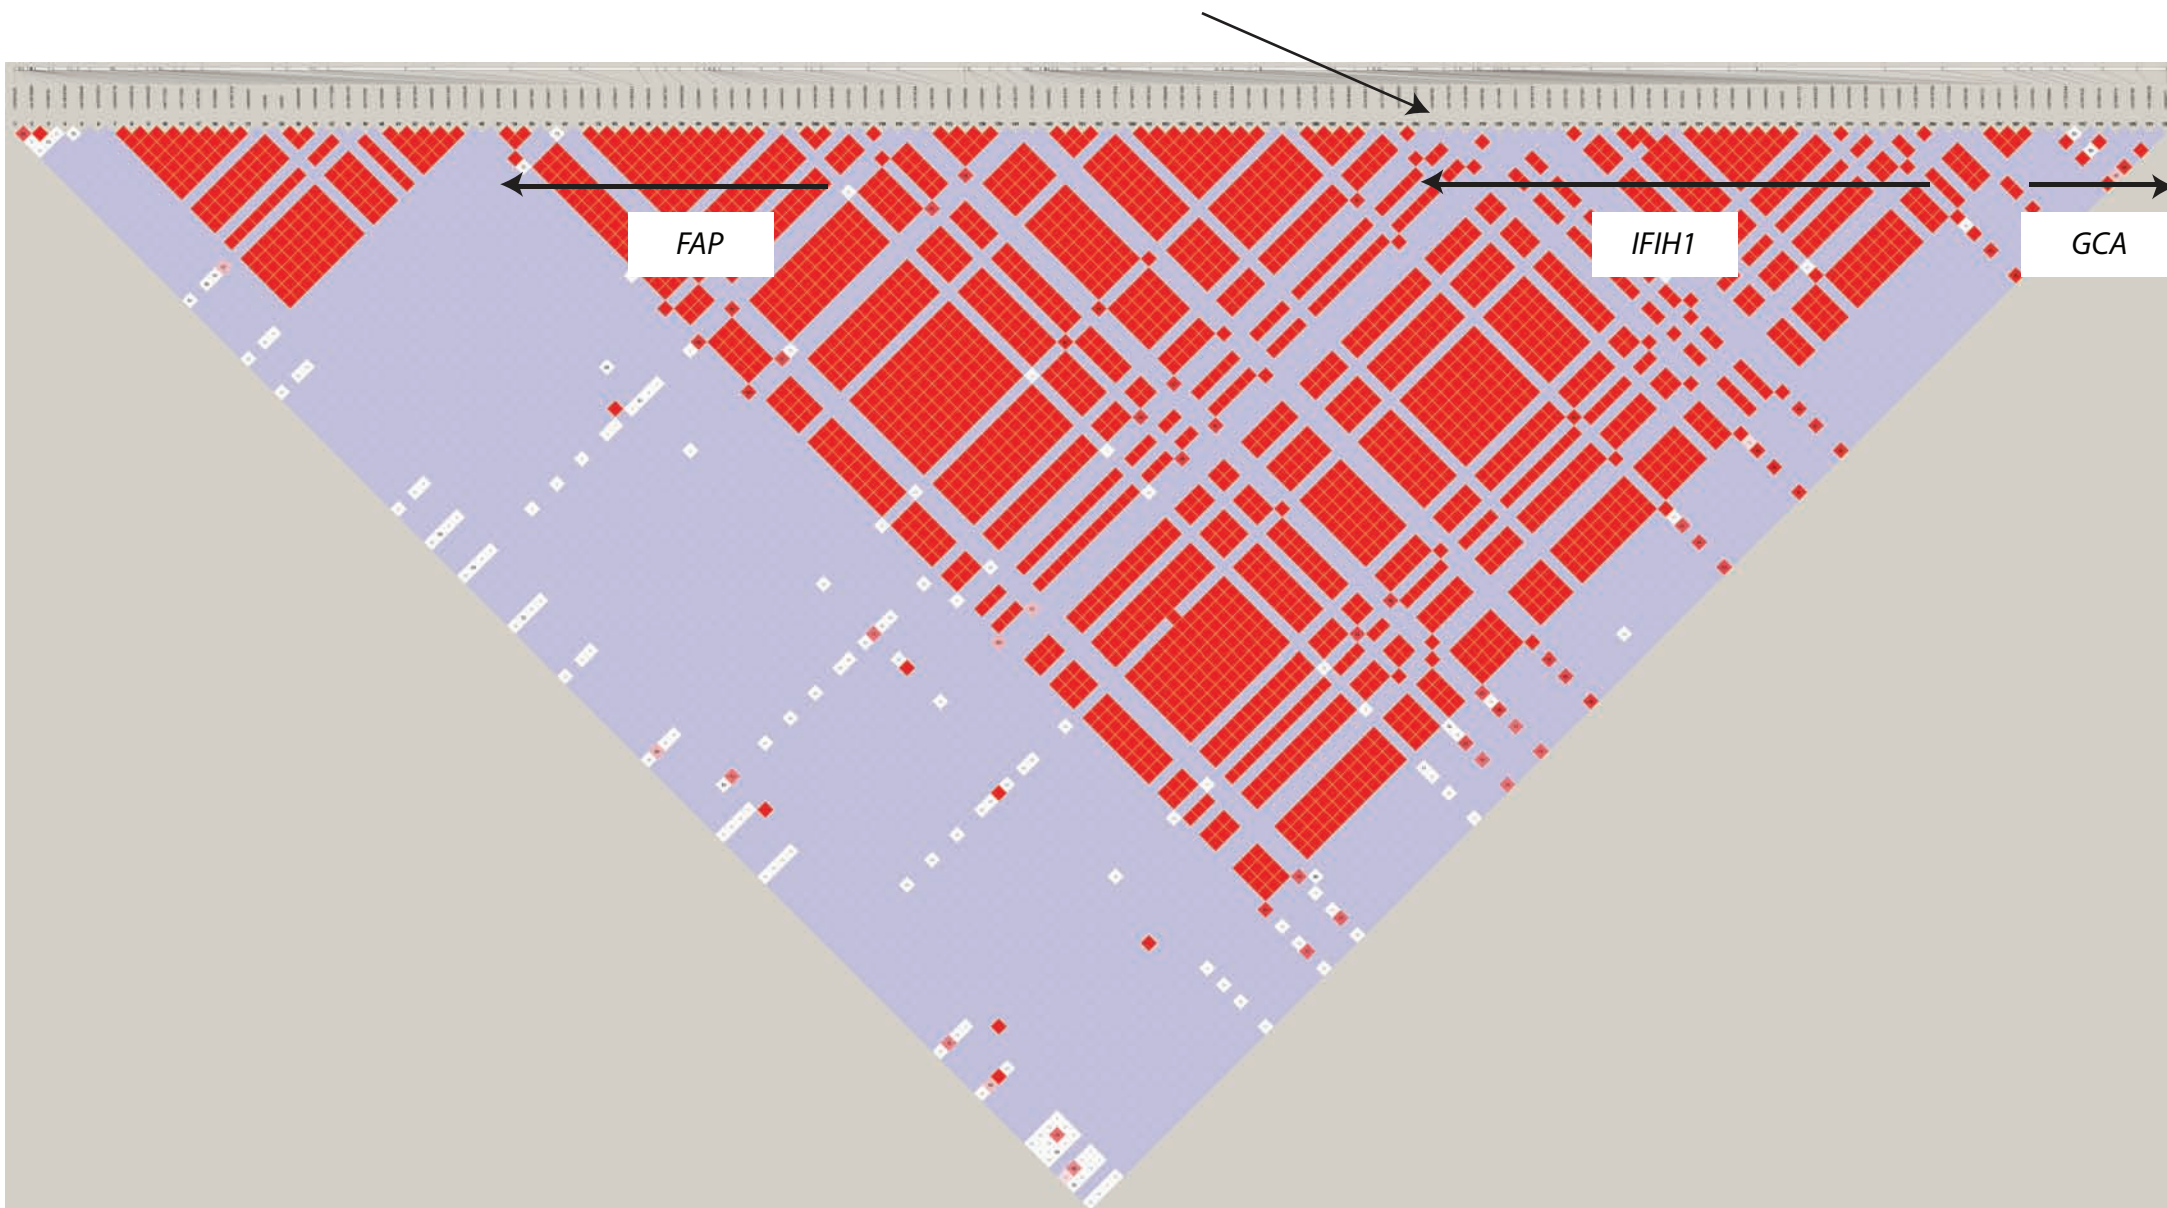

**Figure S2D: LD pattern in 250kb region around rs1990760**

(Chr 2: 162,700,000-162,949,999 - HAPMAP Data Rel 27 phase II+III Feb09, NCBI assembly dbSNP 126)

Associated variant in *TYK2*: rs280519

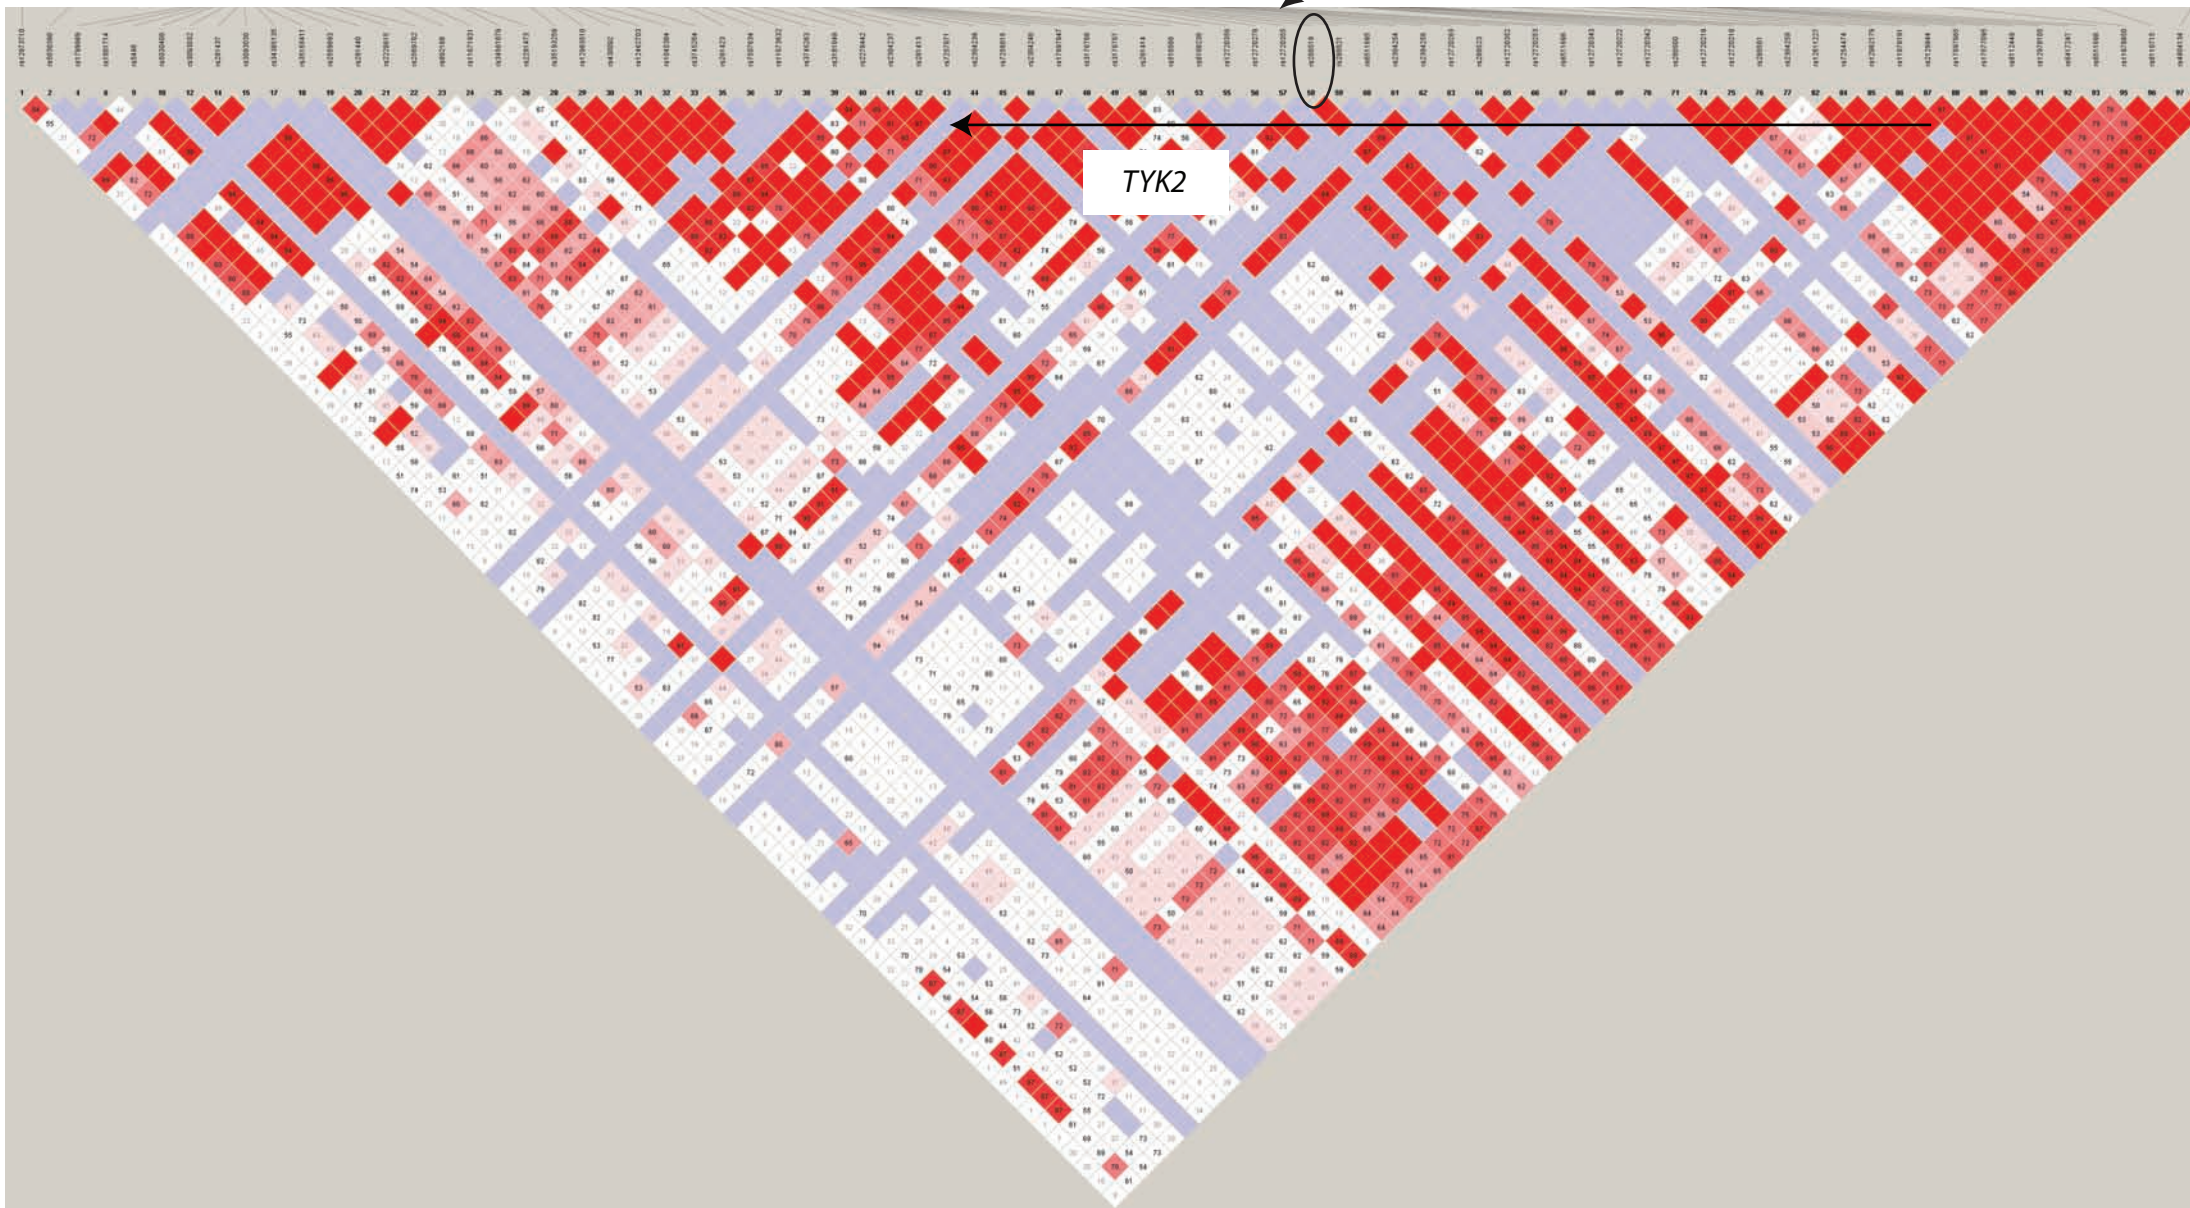

**Figure S2E: LD pattern in 200 kb region around rs280519**

(Chr 19: 10,233,933-10433933 - HAPMAP Data Rel 27 phase II+III Feb09, NCBI assembly dbSNP 126)
